## **Publisher's Note regarding the Article "Urinary System Iatrogenic Injuries: Problem Review" [Urol Int 2021;105:460–469, DOI: 10.1159/000512882] by Vorobev et al.**

This notice is to inform readers that, following publication, it was identified that the peer review process on this article was compromised. This was brought to the attention of the Editor and, in accordance with COPE guidelines, an independent post-publication review of the article was carried out. Further to that review, the original decision to accept the article was upheld. The authors have been kept informed at each stage of the investigation and post-publication review. The authors' institution has been informed of the matter. We have reviewed and further strengthened our editorial processes as a result and the journal is committed to continual improvement to support the integrity of a rigorous peer review.
